# Supplementary material
Source: PubMed Central journal article supplement (PMC6003462)
Supplement: pnas.1722068115.sapp.pdf [file pnas.1722068115.sapp.pdf]

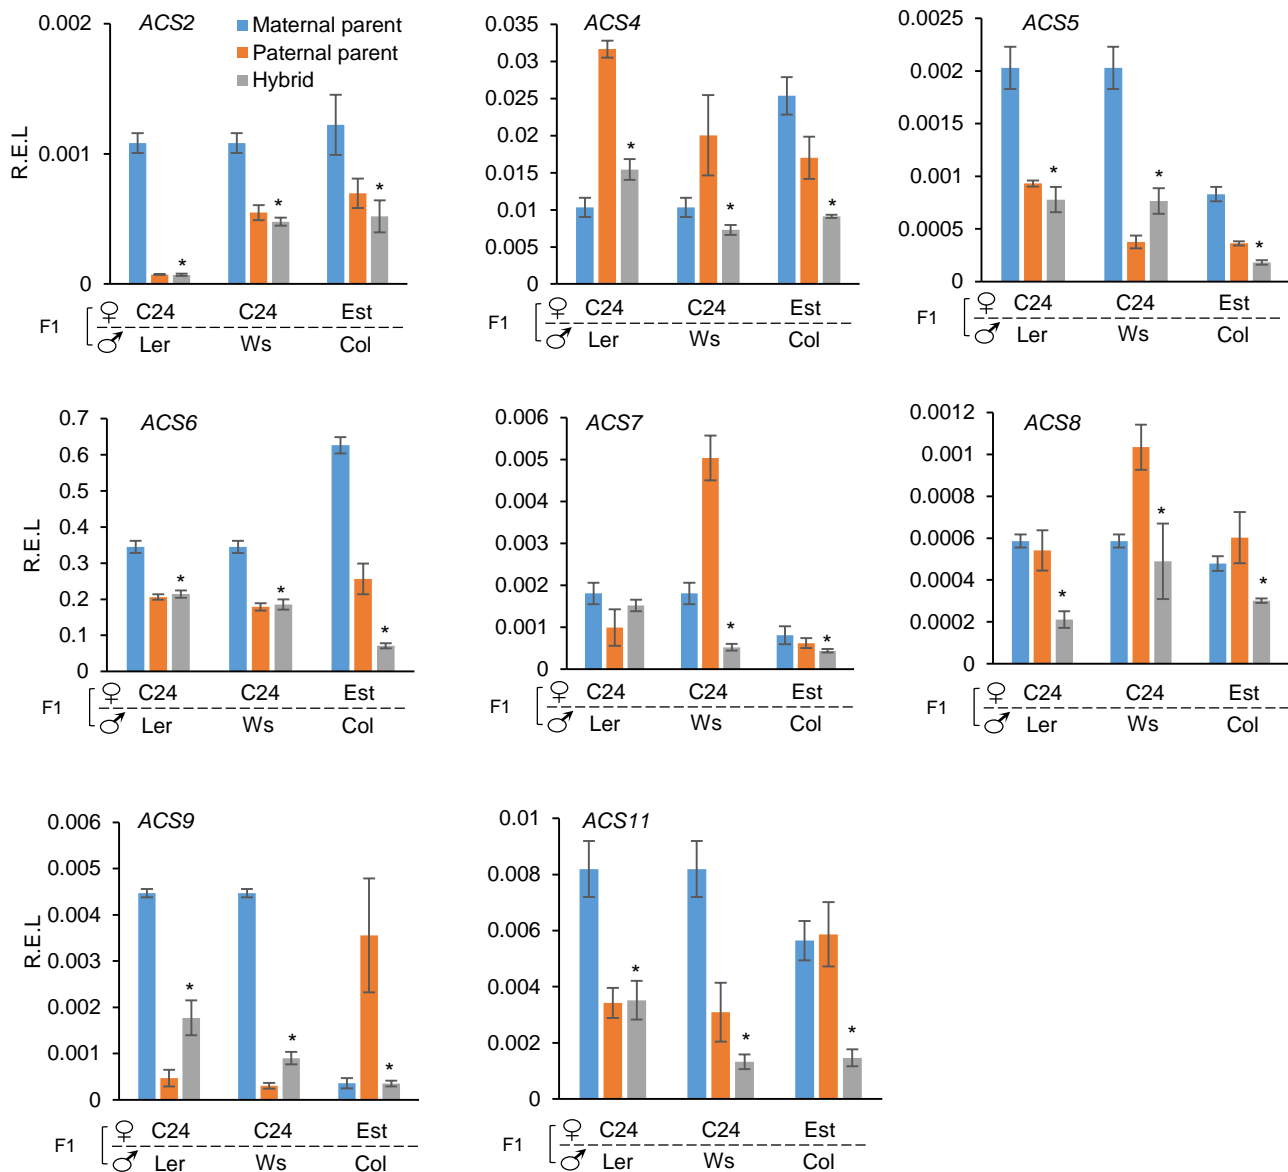

**Fig. S1.** Downregulation of ACS genes in hybrids of various *Arabidopsis* ecotypes. Relative expression levels (R.E.L.) of ACS genes at ZT0 in hybrids of various *Arabidopsis* ecotypes (C24, Ler, Ws, Est, and Col). Asterisks indicate down-regulation in the hybrids at statistical significance levels of  $P < 0.05$ , compared with MPV.

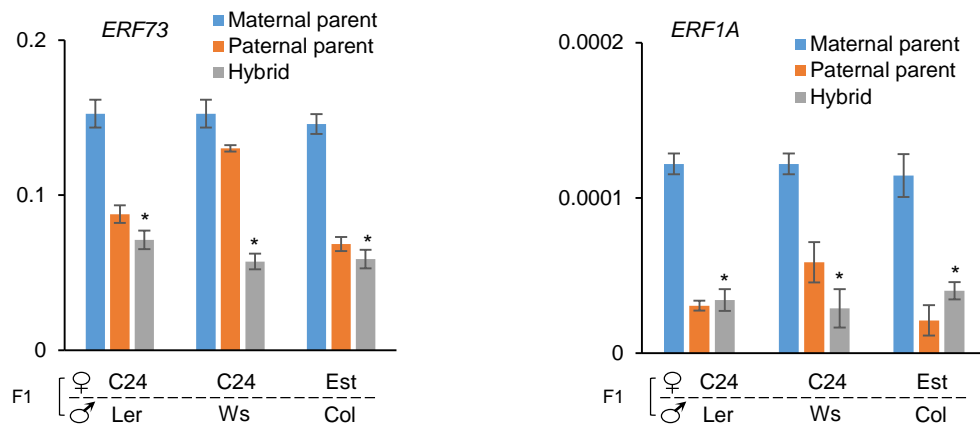

**Fig. S2.** Downregulation of *ERF73* and *ERF1A* in hybrids of various *Arabidopsis* ecotypes. Relative expression levels (R.E.L.) of ACS genes at ZT0 in hybrids of various *Arabidopsis* ecotypes (C24, Ler, Ws, Est, and Col). Asterisks indicate down-regulation in the hybrids at statistical significance levels of  $P < 0.05$ , compared with MPV.

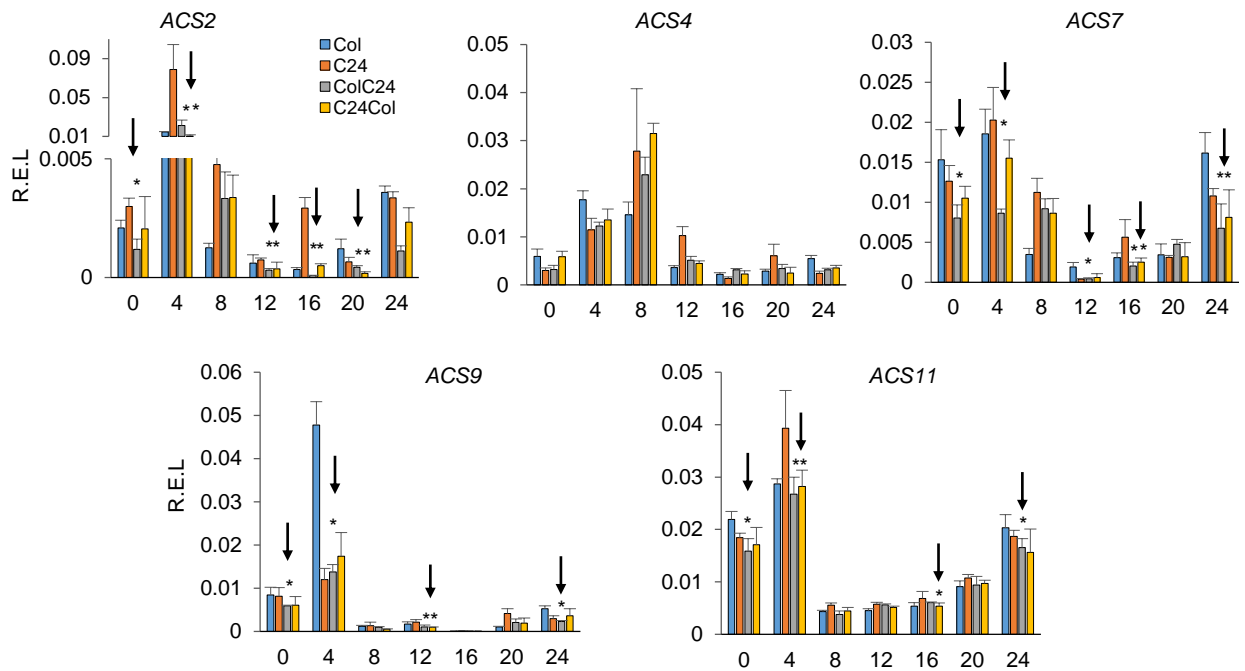

**Fig. S3.** Downregulation of ACS genes at different time points in hybrid. Relative expression levels (R.E.L.) of ACS genes every 4h in a 24h period (ZT0 = dawn) in the reciprocal F1 hybrids (ColXC24 and C24XCol) and the parents (Col and C24). Asterisks indicate down-regulation (arrows) in the hybrids at statistical significance levels of  $P < 0.05$ , compared with MPV.

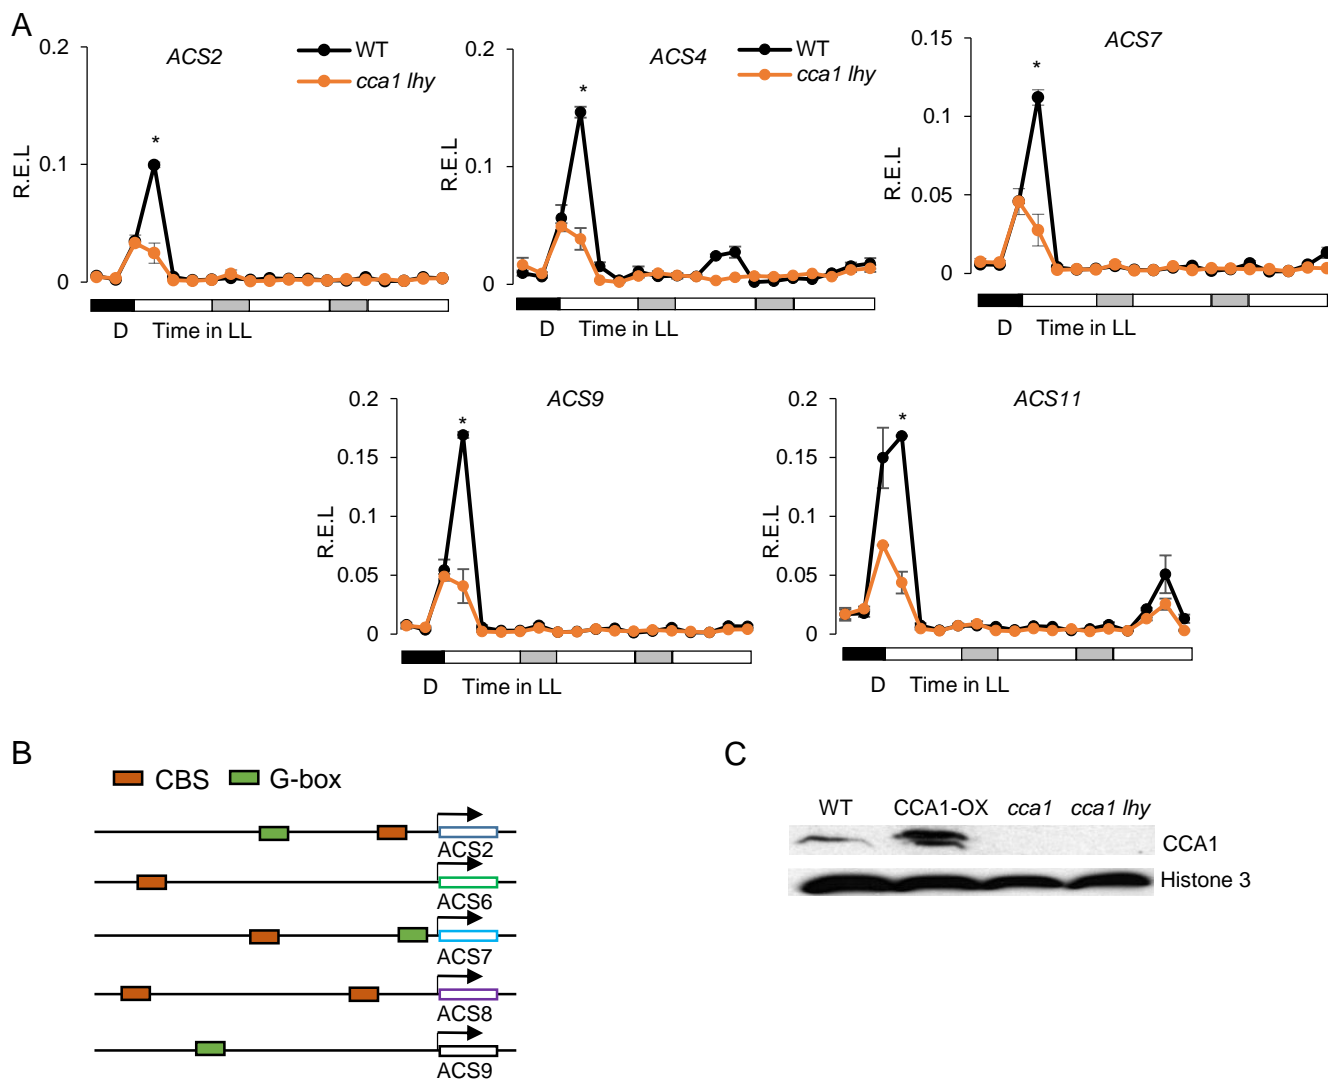

**Fig. S4.** Indirect roles of CCA1 on expression regulation of ACS genes. (A) Relative expression levels of ACS2, ACS4, ACS7, ACS9 and ACS11 in WT (Ws) and *cca1 lhy* mutant every 4h under a diurnal cycle (24h) followed by constant light (LL) (48h) conditions. Black, white, and grey boxes indicate dark, light, and subjective night, respectively. Asterisks indicate down-regulation in *cca1 lhy* mutant at statistical significance levels of  $P < 0.05$ , compared with wild type. (B) Distribution of CCA1-binding site (CBS) and G-box (PIF-binding motif) elements in promoters of ACS2, ACS6, ACS7, ACS8 and ACS9. (C) Western blot confirmed specific binding activity of anti-CCA1 antibodies to CCA1 protein.

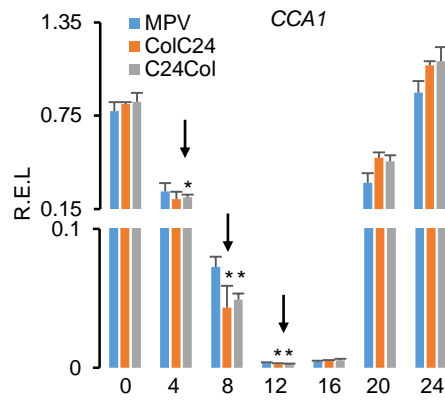

**Fig. S5.** Relative expression levels (R.E.L.) of *CCA1* every 4h in a 24h period (ZT0 = dawn) in the reciprocal F1 hybrids (ColXC24 and C24XCol) compared with MPV. Asterisks indicate down-regulation (arrows) in the hybrids at statistical significance levels of  $P < 0.05$ , compared with MPV.

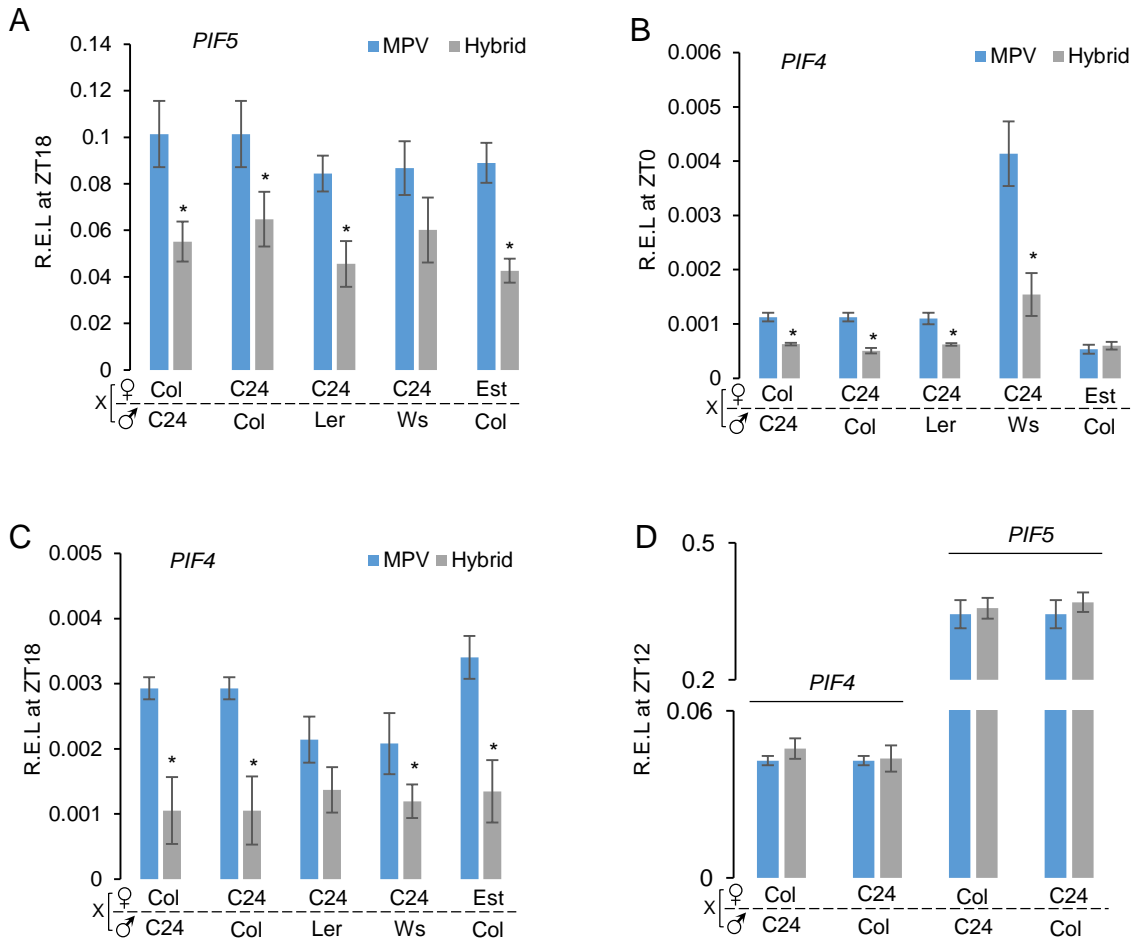

**Fig. S6.** *PIFs* were repressed in hybrids of various *Arabidopsis* ecotypes. (A) Relative expression levels to the mid-parent level of *PIF5* at ZT18 in hybrids of various *Arabidopsis* ecotypes. Asterisks indicate down-regulation in the hybrids at statistical significance levels of  $P < 0.05$ , compared with MPV. (B-C) Relative expression levels to the mid-parent level of *PIF4* at ZT0 (B) and ZT18 (C) in hybrids of various *Arabidopsis* ecotypes. Asterisks indicate down-regulation in the hybrids at statistical significance levels of  $P < 0.05$ , compared with MPV. (D) Relative expression levels to the mid-parent level of *PIF4* and *PIF5* at ZT12 in hybrids of Col-0 and C24.

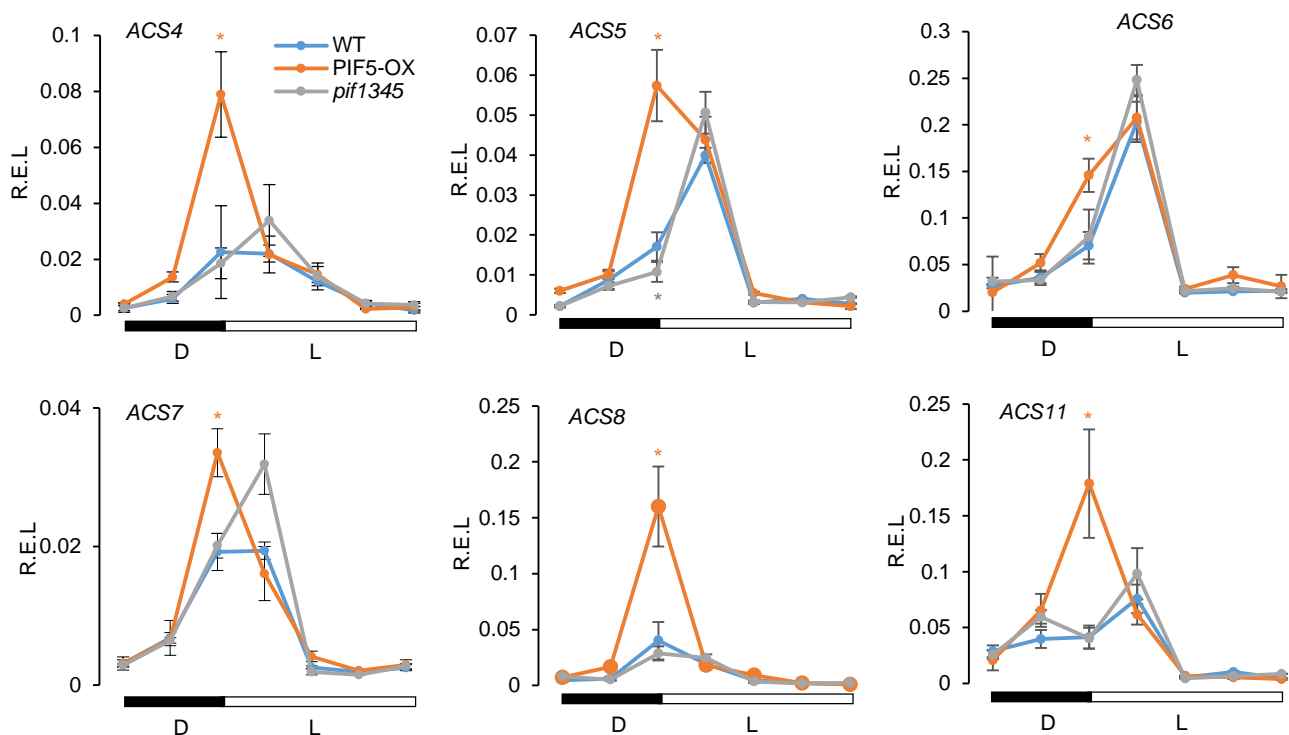

**Fig. S7.** ACS genes were regulated by *PIFs*. Relative expression levels of ACS4, ACS5, ACS6, ACS7, ACS8 and ACS11 in WT (Col-0), PIF5-OX and *pif1345* mutant in diurnal conditions (dark, D and light, L). Asterisks in orange and grey respectively indicate upregulation in PIF5-OX and downregulation in *pif1345* at statistical significance levels of  $P < 0.05$ , compared with WT.

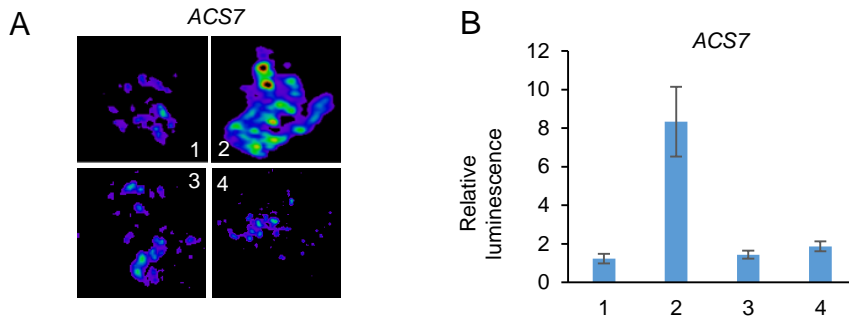

**Fig. S8.** ACS genes were directly activated by PIF5. (A) Transient expression assays showed that PIF5 directly activated expression of ACS7 as in Fig. 2F. (B) Relative luminescence intensity (Y-axis) for each comparison in (A).



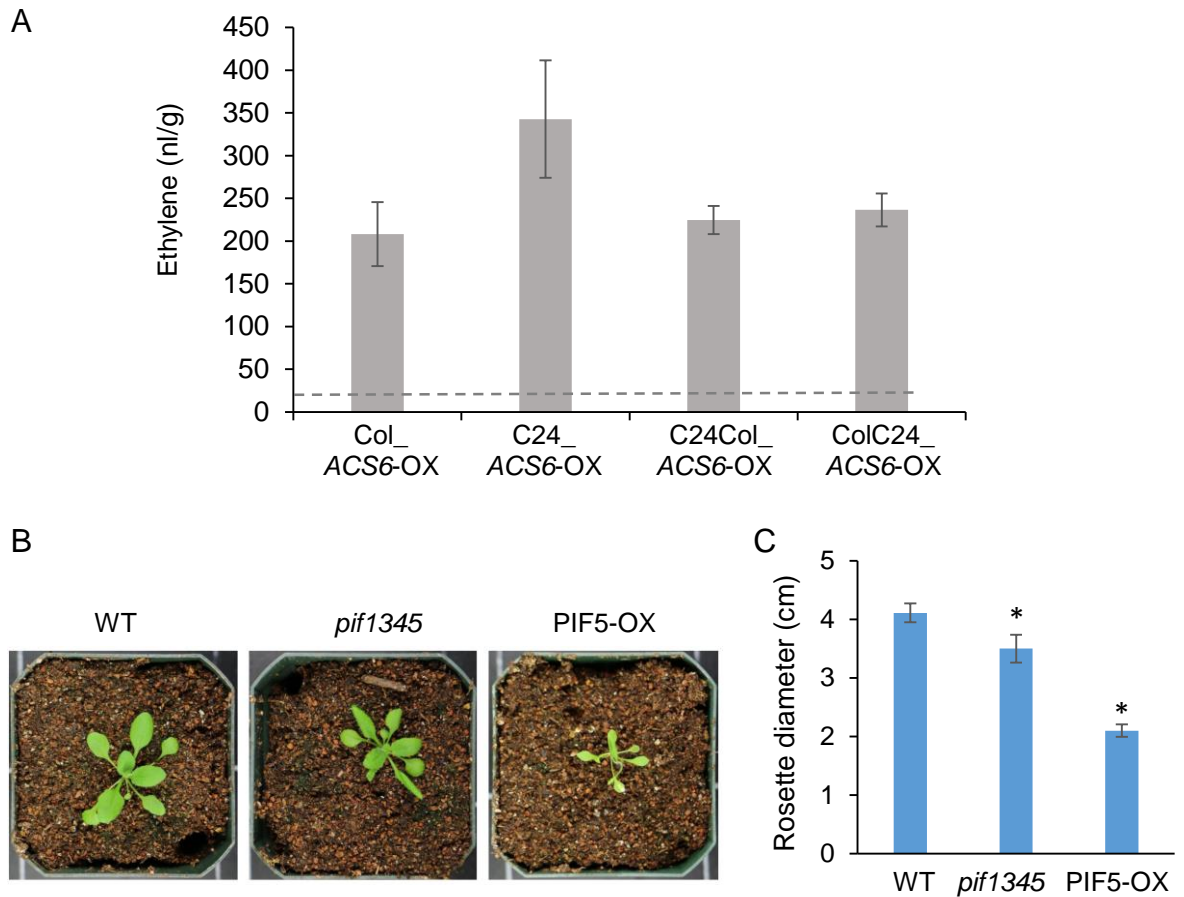

**Fig. S9.** Ethylene production in ACS6-OX lines and plant growth reduction in *PIF* lines. (A) Ethylene production in the transgenic plants that over-expressed *ACS6<sup>DDD</sup>* in Col\_ACS6-OX, C24\_ACS6-OX, F1 hybrid (ColXC24\_ACS6-OX), and reciprocal hybrid (C24XCOL\_ACS6-OX) lines. A dashed line indicates an average level of ethylene in the wild-type plant. (B) Representative seedling images of the wild type (WT), *pif1345* mutant, and PIF5-OX line at 21 days after sowing. (C) Quantitative analysis of rosette diameter of the plants in (A). Asterisks indicate a statistical significant level ( $P < 0.05$ ) compared with WT.

**Table S1 Primers used in this study.**

| Name       | Primer sequence                  | Usage              |                    |
|------------|----------------------------------|--------------------|--------------------|
| ACS2F      | ATTTCGCTGGATGGATTTGAGACA         | RT-qPCR            |                    |
| ACS2R      | AACGGAAGGAAGAGCCAGGAGACA         |                    |                    |
| ACS4F      | CCGGGTTGGTTTAGAGTTTGTTC          |                    |                    |
| ACS4R      | TTCGCTTTTACTCTTTTGGCATCT         |                    |                    |
| ACS5F      | TAAATGGAGAACCGGAGCAGAGAT         |                    |                    |
| ACS5R      | CAAGTGGGTTAGATGGATTCGTGA         |                    |                    |
| ACS6F      | CCGATGGCTGCAACAATGATG            |                    |                    |
| ACS6R      | AGGCGAATGAGGCGAGAAGAAGC          |                    |                    |
| ACS7F      | TATGCTGGCTTCTATGTTGTCG           |                    |                    |
| ACS7R      | AATAGCCCTGCGTTCCCTTCA            |                    |                    |
| ACS8F      | TTGCGAATTTGAGCGAAGAGACAT         |                    |                    |
| ACS8R      | AGCCGAAAACCCAATTAGAGACT          |                    |                    |
| ACS9F      | ACATACCTCGACGAAAACAGAAA          |                    |                    |
| ACS9R      | GTCAACCCAACAGAACAAACCA           |                    |                    |
| ACS11F     | CCTGGTTGGTTTAGAGTTTGTTC          |                    |                    |
| ACS11R     | GGAGACCCATTTGTTGATAAGAGA         |                    |                    |
| ERF1aF     | TTTGTGAATTTCCGTTGAGAGT           |                    |                    |
| ERF1aR     | TCGTTAGAAGAAGAAAAGAAGAT          |                    |                    |
| ERF73F     | AATAATCCGGACACGCTTCTG            |                    |                    |
| ERF73R     | CGTTGTTGGCTTCTTCACTATCAT         |                    |                    |
| PIF4F      | TTGGGCGTGGAACTTGGACT             |                    |                    |
| PIF4R      | CTGGGTTTGGGTTTGTCTCTATG          |                    |                    |
| PIF5F      | GTTTCCCGGGGTACAATCATCTCC         |                    |                    |
| PIF5R      | GCTGGTTGTTGTTGCACGGTCTG          |                    |                    |
| ACS2pF     | CTCGAGATCAACTTATTATTTATTGGC      |                    | Promoter cloning   |
| ACS2pR     | TCTAGATTGCTGTGCAATTCTCACTT       |                    |                    |
| ACS6pF     | CTCGAGAACATCAGTCTGATAAAAAA       |                    |                    |
| ACS6pR     | GGATCCTTTTTGTTTCTTCTTAATA        |                    |                    |
| ACS7pF     | CTCGAGGTACATGAAAAGTGGTAAAAGTAT   |                    |                    |
| ACS7pR     | GGATCCTTTTTCTTAGAGCTTCGAACCTGA   |                    |                    |
| ACS8pF     | CTCGAGATATCAAACATAACACAC         |                    |                    |
| ACS8pR     | GGATCCTTCTTAATTAGCTCTAGAGAT      |                    |                    |
| ACS9pF     | CTCGAGCTAATAGTGACAAGTGAACCT      |                    |                    |
| ACS9pR     | GGATCCTTTTTGATATAAAAAATCAAAAAG   |                    |                    |
| CCA1-CDSF  | CTCGAGATGGAGACAAATTCGTCTGGA      | CDS cloning        |                    |
| CCA1-CDSR  | TCTAGATCATGTGGAAGCTTGAGTTTC      |                    |                    |
| PIF5CDSF   | TACCGCTCGAGATGGAACAAGTGTGCTGATTG |                    |                    |
| PIF5CDSR   | CGCGGATCCTCAGCTATTTACCCATATGAA   |                    |                    |
| UBQ10ChipF | TCCAGGACAAGGAGGTATTCCTCCG        | ChIP-qPCR for CCA1 |                    |
| UBQ10ChipR | CCACCAAAGTTTTACATGAAACGAA        |                    |                    |
| TOC1EEF    | TTTTATGGCCTGCACTTTTTATTG         |                    |                    |
| TOC1EER    | GGTGGACTTGGGATTTTTAGG            |                    |                    |
| ACS2CBSF   | TGCTAGCAAAAACACAACCATCT          |                    |                    |
| ACS2CBSR   | TGAAAAGTAACAAGCGAACCAA           |                    |                    |
| ACS6CBSF   | TTGGTCAAAGTGAAGGCTTCAAAA         |                    |                    |
| ACS6CBSR   | TGATAGTGGCAGACATTGGAC            |                    |                    |
| ACS7CBSF   | TCATACTTAATTAGAGACGAA            |                    |                    |
| ACS7CBSR   | GGCTATCCATTTACACTTTATT           |                    |                    |
| ACS8CBSF   | TACATTAAGACGGTCCAAGAG            |                    |                    |
| ACS8CBSR   | CTAACAAAAACTATATCGGCAACA         |                    |                    |
| ACS2GF     | AGGAGGATTTGAGTTTTTGACATT         |                    | ChIP-qPCR for PIF5 |
| ACS2GR     | GTTGGTGGGTTTGGACTCTTT            |                    |                    |
| ACS7GF     | GGTCACGTCTGCTATATACTC            |                    |                    |
| ACS7GR     | CTTAGAGCTTCGAACCTGACACGT         |                    |                    |
| ACS9GF     | CAAGGCCATTTATTATGGGCT            |                    |                    |
| ACS9GR     | AACTGAATAACAACAGATTCTA           |                    |                    |
| PP2AF      | CTGGCGTGTGCGTTATATGGTT           |                    |                    |
| PP2AR      | CAACAAACATGGACTTCCAAGTACCA       |                    |                    |
